# Supplementary material
Source: publisher site journal article supplement (https://www.dovepress.com/get_supplementary_file.php?f=284583.docx)
Supplement: Supplementary file 1 [file get_supplementary_file.php]

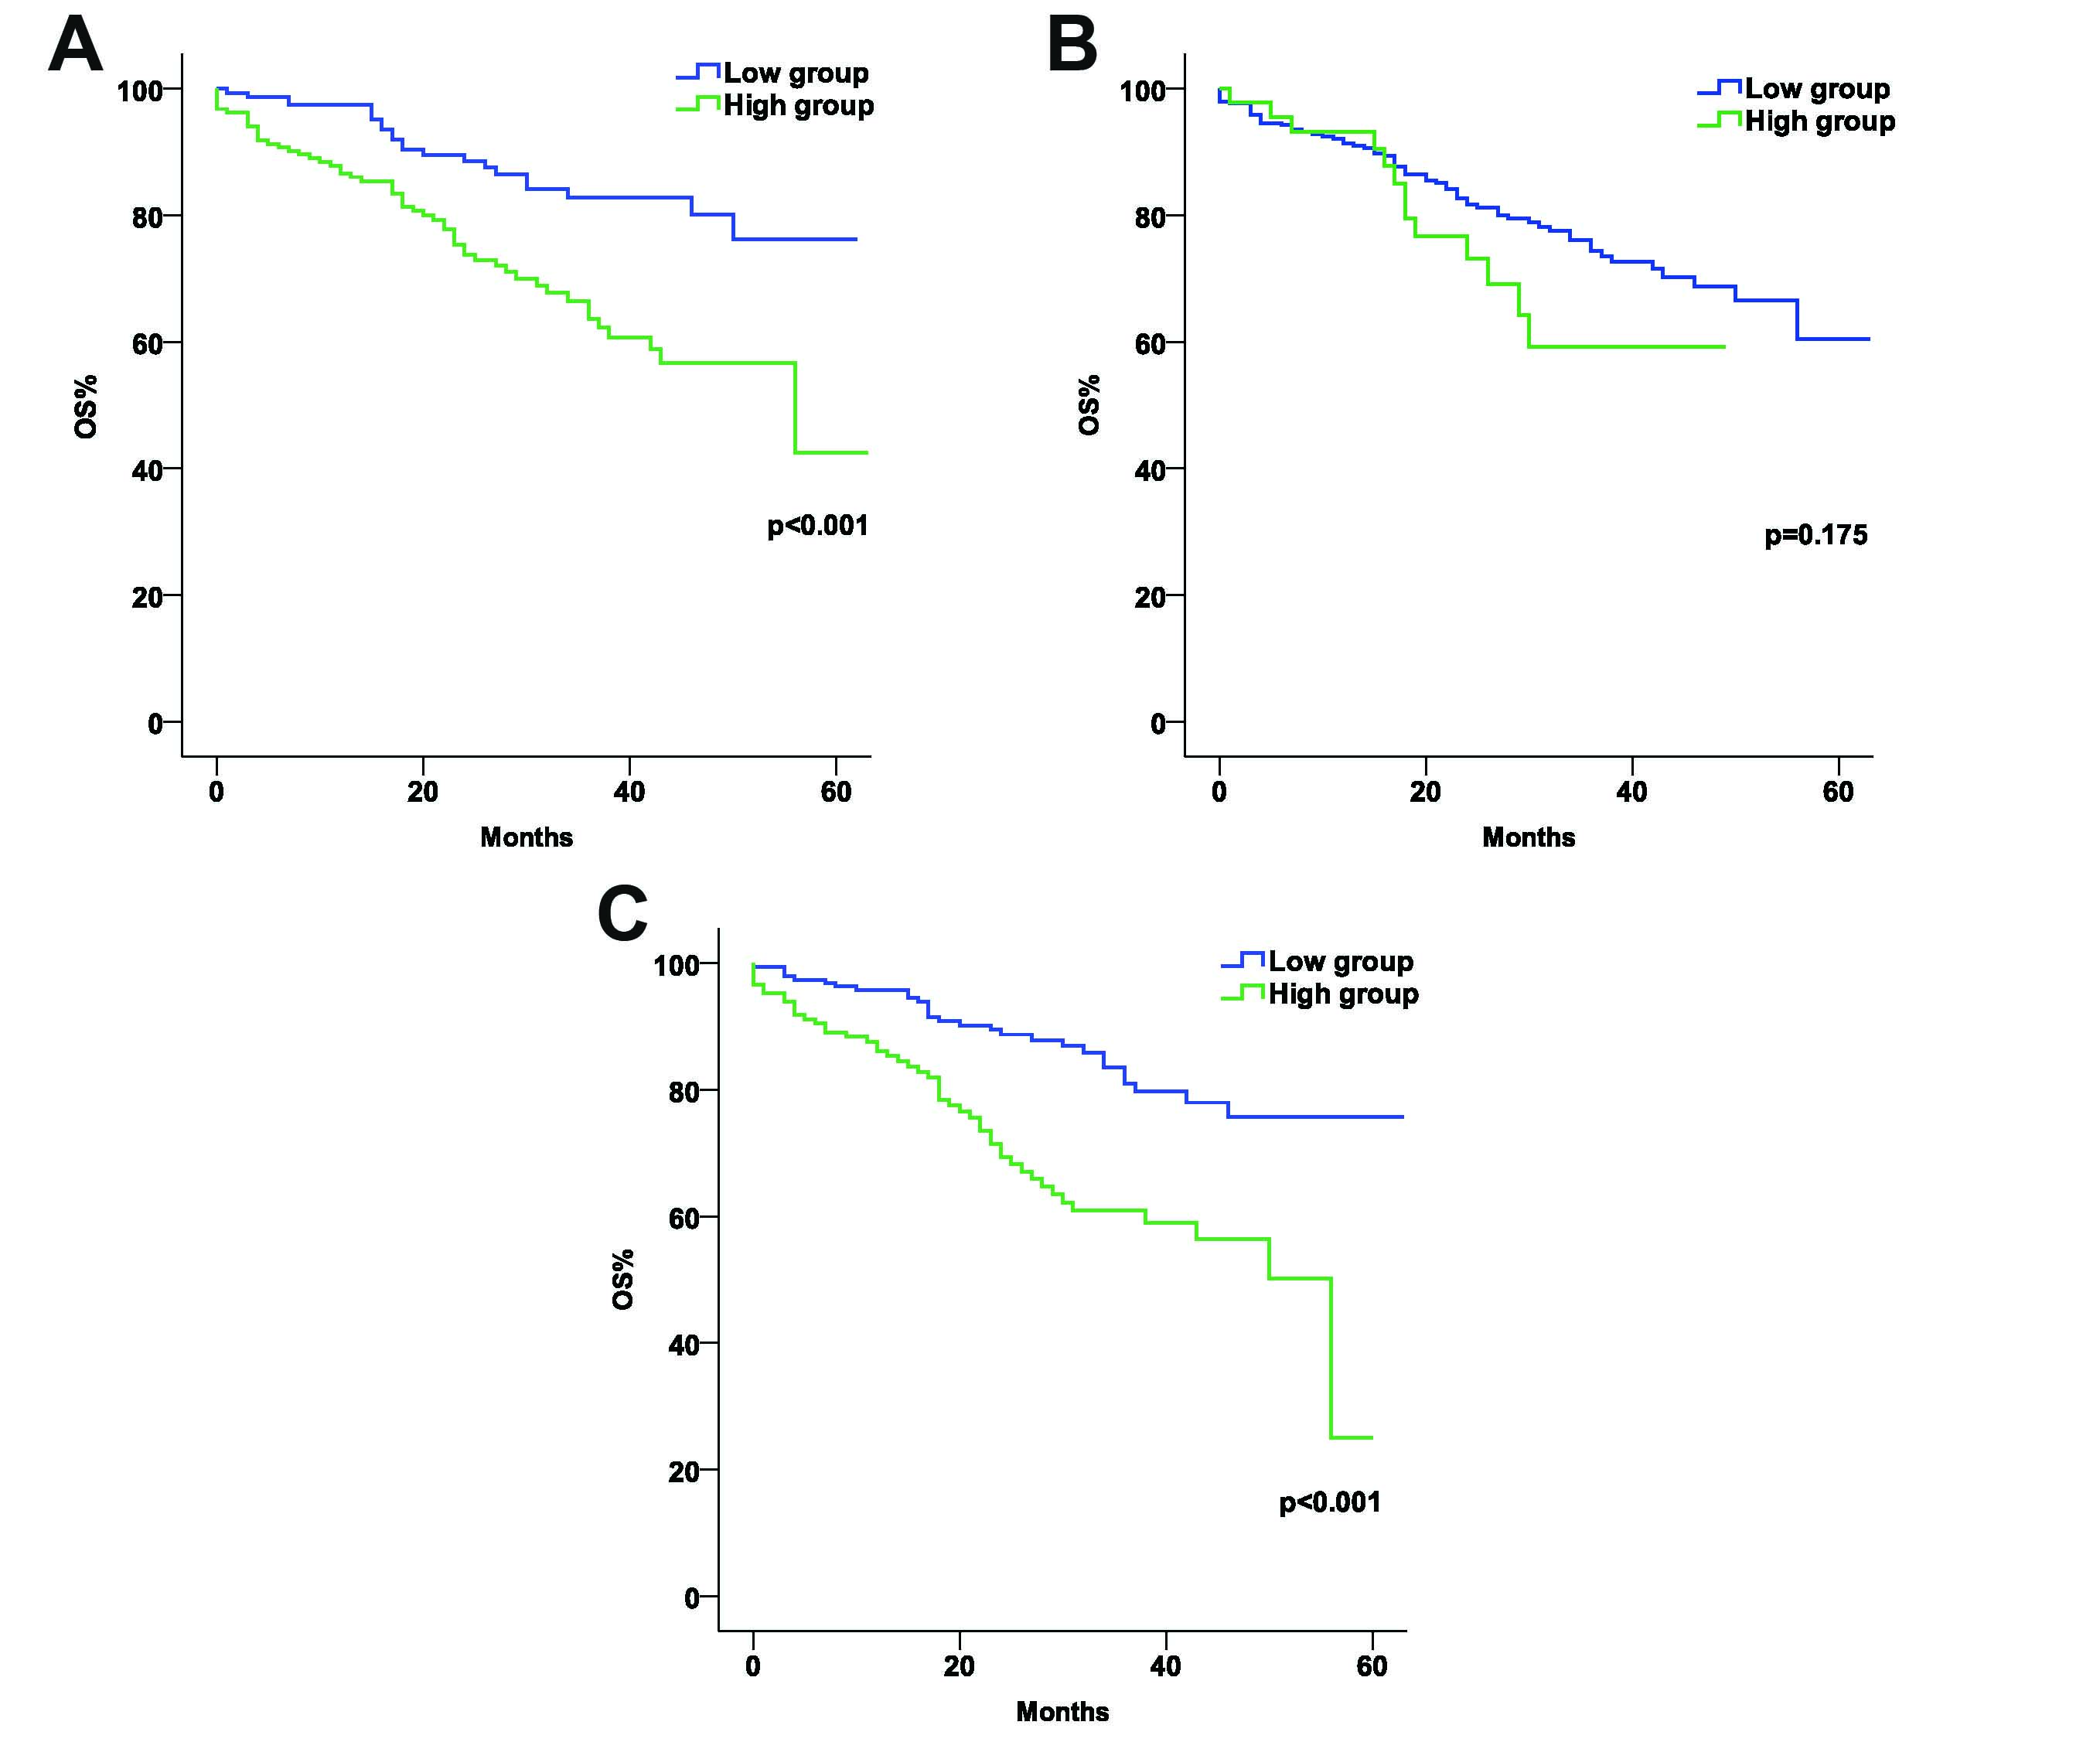


Supplementary Figure.1. Kaplan–Meier analysis showing cumulative mortality according to the optimal cut off value. (A) the reciprocal of lymphocyte counts, (B) platelet counts, (C) neutrophil counts.

Abbreviations: OS: overall survival.
